# Supplementary material
Source: Springer Nature journal article supplement (https://www.springermedizin.de/resource/supplementary/12943_2013_1243_MOESM7_ESM.pdf/9553076)

**a**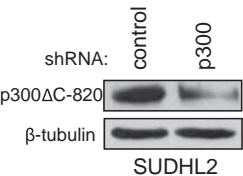**b**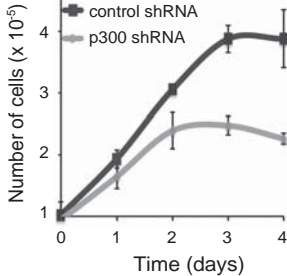**c**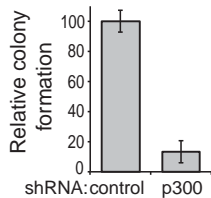**d**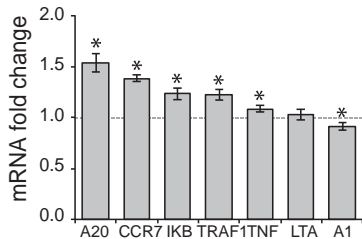**e**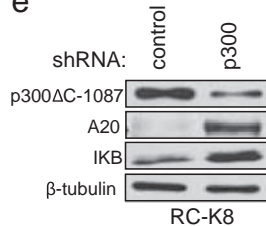**f**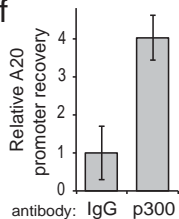

Supplement: MOESM7 [file 9553076]
